# Supplementary material
Source: publisher figshare collection journal article supplement (https://acs.figshare.com/ndownloader/files/4165351)
Supplement: Supplementary file 1 [file 4165351]

Supporting Information for:

## Chrominance to Dimension: a Rapid and Real-time Method for Measuring the Size of Single Gold Nanoparticles

Chao Jing<sup>†</sup>, Zhen Gu<sup>†</sup>, Yi-Lun Ying<sup>†</sup>, Da-Wei Li<sup>†</sup>, Lei Zhang<sup>†, ‡</sup>, Yi-Tao Long<sup>\*†</sup>

<sup>†</sup>Key Laboratory for Advanced Materials & Department of Chemistry, East China University of Science and Technology, 130 Meilong Road, Shanghai 200237, P. R. China, <sup>‡</sup>School of Materials Science & Engineering, Nanjing University of Posts and Telecommunications, 9 Wenyuan Road, Nanjing 210046, P.R. China

E-mail: ytlong@ecust.edu.cn

Tel/Fax: +86-21-64250032.

### Contents:

#### 1. Supplementary Methods

2. Supplementary Figuers: Figure S-1: The chromaticity diagram according to the 1931 Commission International de l'Eclairage.

Figure S-2: The size calculation process of gold nanoparticles by Matlab.

Figure S-3: Dark-field image of a mass of GNPs.

Figure S-4: The calculated wavelength peaks of scattering light from GNPs (N =1766) in Figure S-3 by Matlab.

Figure S-5: The diameter distribution of 1766 GNPs in Figure 3 and 4 calculated by Matlab.

Figure S-6: Statistic data of nanoparticles' spectral changes without (A) and with (B) the treatment of cancer drug. The peak wavelengths of twenty nanoparticles were selected in each histogram.

#### 3. References

4. The Matlab program for calculating wavelength and diameter for one nanoparticle.

## 1. Supplementary Methods

### Data analysis: RGB to wavelength

The calculation process was carried out using the Matlab program. Each pixel in the color spot of a single nanoparticle in the dark-field image was translated into an RGB value, VR, VG, or VB. The intensity (I) of scattering light from GNPs was calculated by eq S-1 as below.

$$I=VR*0.299+VG*0.5876+VB*0.114 \quad (S-1)$$

The RGB values were converted into coordinates in the chromaticity diagram (Figure S-1). Then, the wavelengths and intensities of every pixel were calculated and wavelength with maximum intensity was considered as peak wavelength. The diameter of GNPs could be estimated by the relationship between the peak wavelength of scattering light and size. The detailed calculation process was illustrated in Figure S-2.

## 2. Supplementary Figuers:

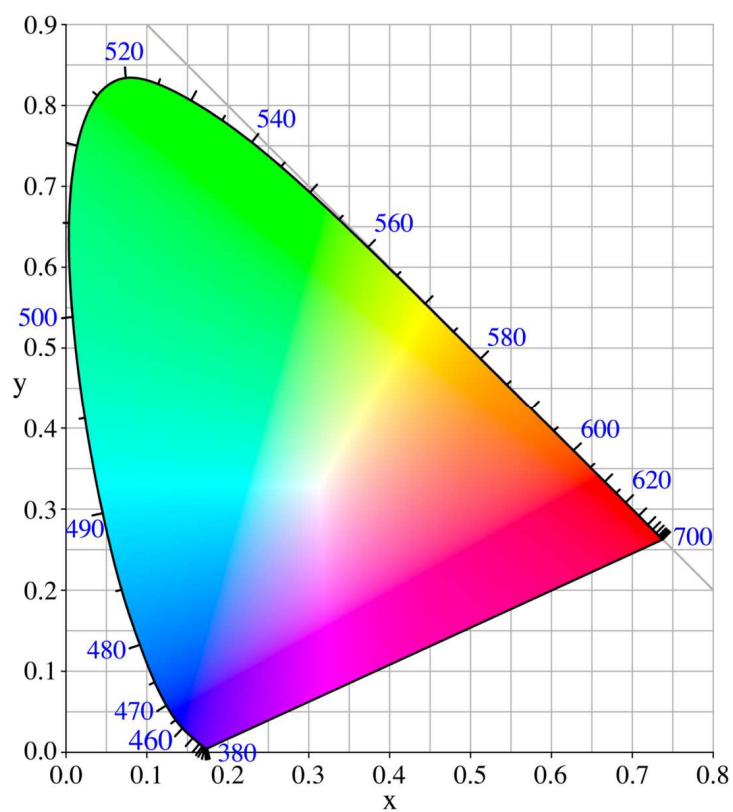

**Figure S-1** The chromaticity diagram according to the 1931 Commission International de l'Eclairage.<sup>1</sup>

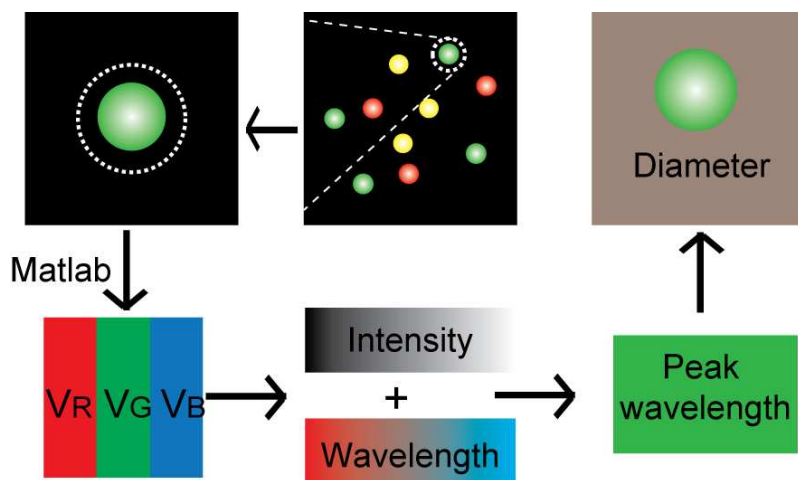

**Figure S-2** The size calculation process of gold nanoparticles by Matlab.

1

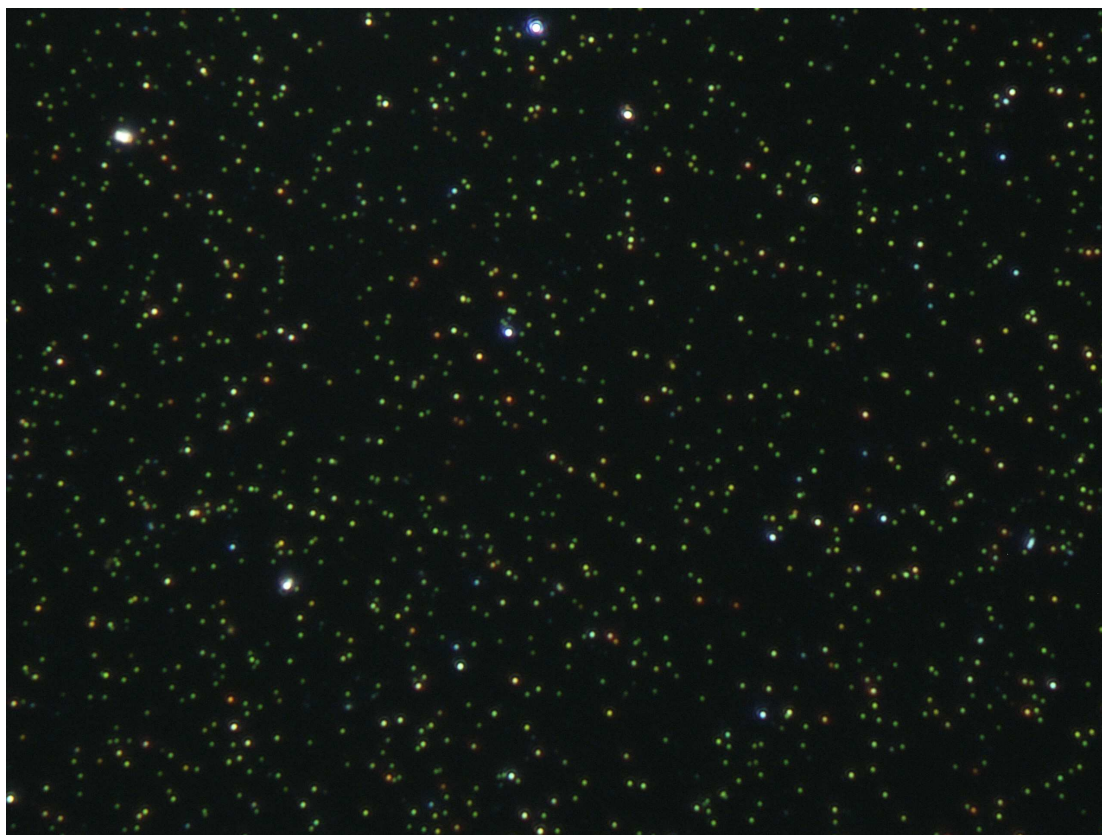

2

3 **Figure S-3** Dark-field image of a mass of GNPs.

4

5

6

7

8

9

10

11

12

13

14

15

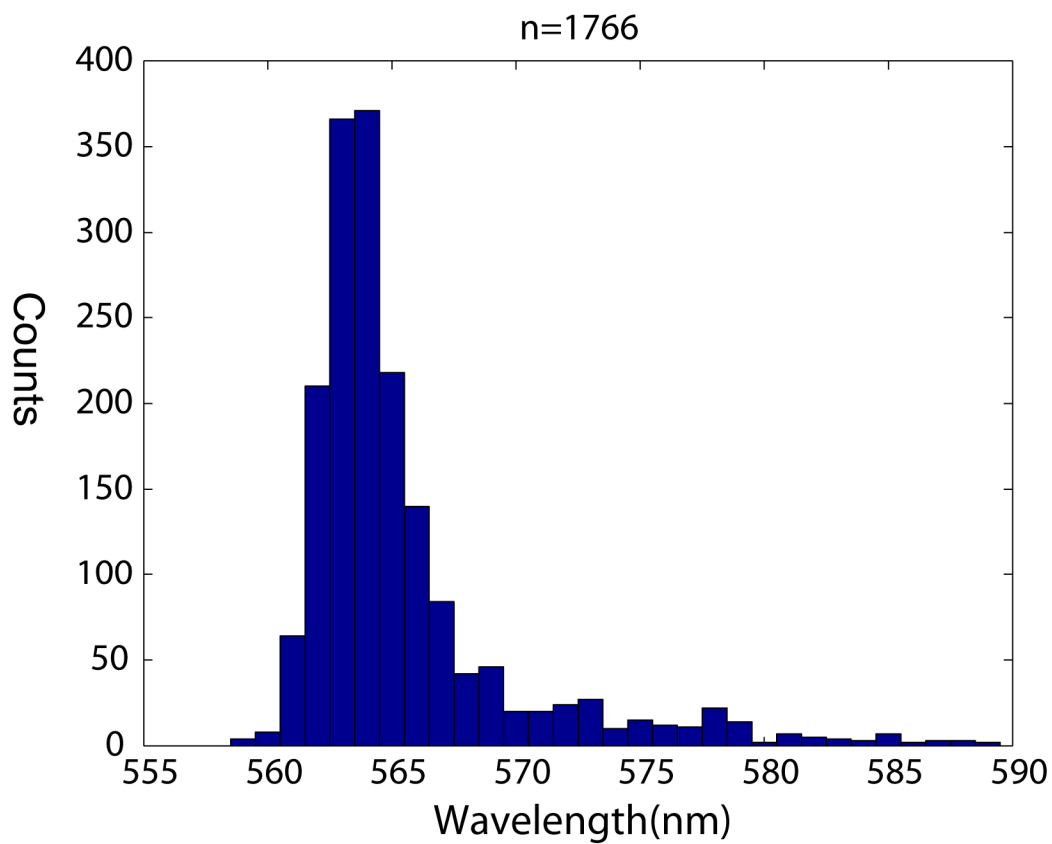

**Figure S-4** The calculated wavelength peaks of scattering light from GNPs (N =1278 ) in Figure S-3 by Matlab.

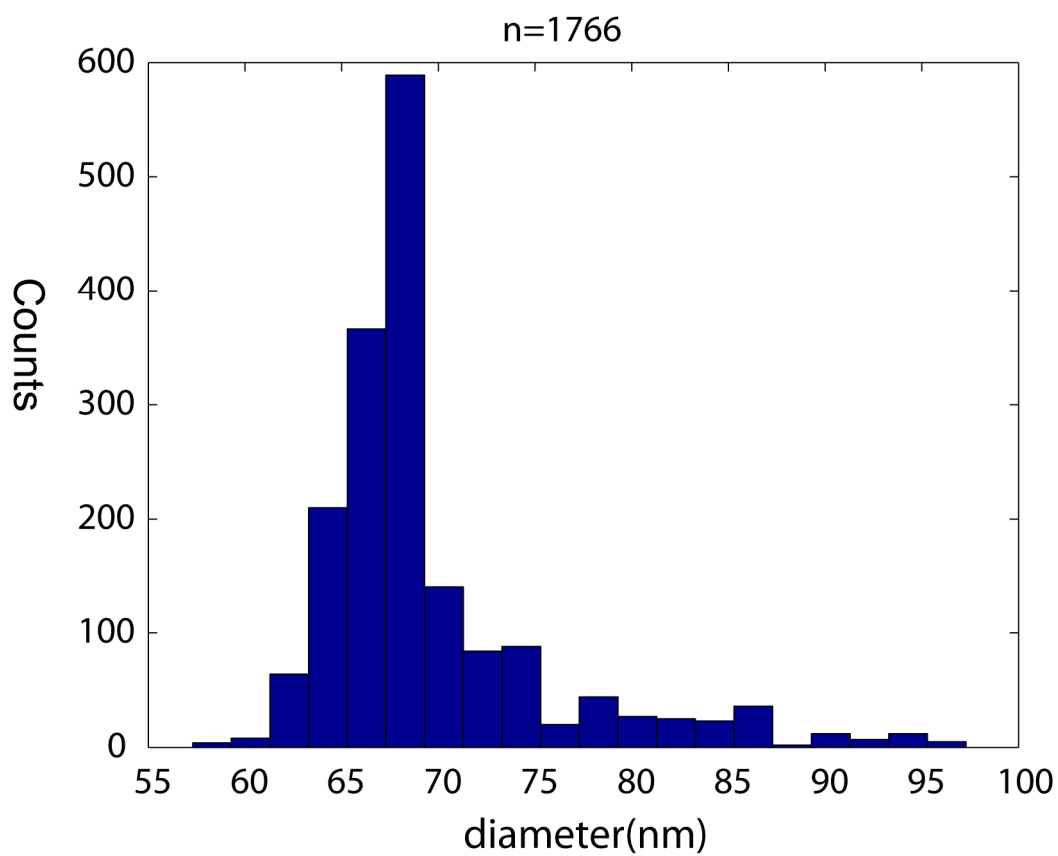

**Figure S-5** The diameter distribution of 1766 GNPs in Figure 3 and 4 calculated by Matlab.

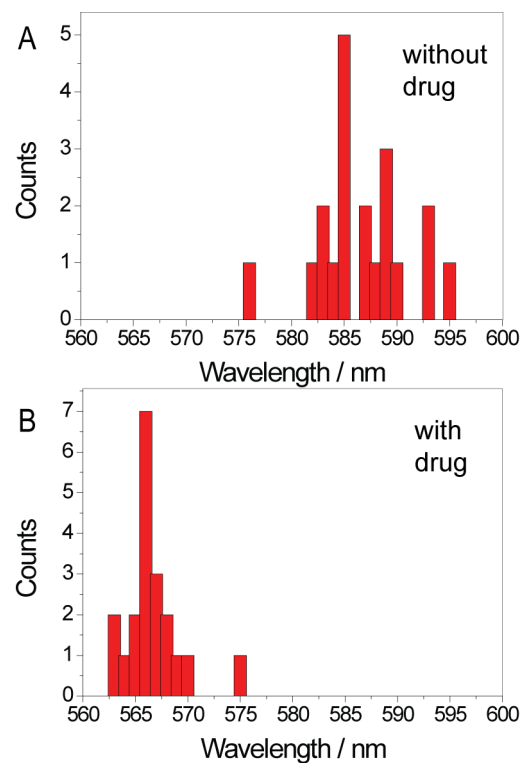

**Figure S-6** Statistic data of nanoparticles' spectral changes without (A) and with (B) the treatment of cancer drug. The peak wavelengths of twenty nanoparticles were selected in each histogram.



1    **3. References**

2    (1) [http://en.wikipedia.org/wiki/CIE\\_1931\\_color\\_space](http://en.wikipedia.org/wiki/CIE_1931_color_space)

3

4

5

6

7

8

9

10

11

12

13

14

15

16

17

18

19

20

21

22

23

24

25

26

27

```
1  4. The Matlab program for calculating wavelength and diameter for one nanoparticle.
2
3  clc;
4  clear;
5  A=imread('x.jpg');
6  imshow(A);
7  [a b c]=size(A);
8  A2=zeros(a*b,3);
9  for i=1:a
10     for j=1:b
11         A2((i-1)*b+j,:)=A(i,j,:);
12     end
13 end
14
15 A3=A2*[0.49,0.31,0.2;0.177,0.812,0.011;0,0.01,0.99]';
16 A4=zeros(length(A3),1);
17 for i=1:length(A3);
18     A4(i)=sum(A3(i,:));
19 end
```

```

1
2     A5=[A4 A4 A4];
3     A6=A2./A5;
4     wavelengthA=zeros(a*b,1);
5     load 'RGB to wavelength.mat';
6     for i=1:length(A6)
7         vals=A6(i,1:2);
8         k=zeros(75,3);
9         g=zeros(75,1);
10        for j=1:75
11            k(j,1:2)=R(j,2:3)-vals;
12            g(j)=sqrt(sum(k(j,1:2).^2));
13        end
14        wp=R(g==min(g),1);
15        wavelengthA(i)=wp(1);
16    end
17
18
19    p=A2*[0.299;0.5876;0.114];

```

```

1    wavep=[wavelengthA p];

2    waves=zeros(75,1);

3    for i=1:a*b

4        waves((wavep(i,1)-395)/5)=waves((wavep(i,1)-395)/5)+wavep(i,2);

5    end

6    pxwave=sort(waves);

7    maxwave=find(waves==pxwave(end));

8    maxwave2=find(waves==pxwave(end-1));

9    maxwave3=find(waves==pxwave(end-2));

10   q1=waves(maxwave);

11   q2=waves(maxwave2);

12   q3=waves(maxwave3);

13   maxwave=(maxwave*5+395);

14   maxwave2=(maxwave2*5+395);

15   maxwave3=(maxwave3*5+395);

16

17   if(maxwave<525)

18       if(maxwave2<525)

19           if(maxwave3<525)

```

```
1      disp('error');

2      else

3          maxwave=maxwave3;

4      end

5      else

6          maxwave=maxwave2;

7      end

8  end

9

10     pjwave=maxwave;

11     disp('wavelength peak');

12     disp(maxwave);

13     load 'wavelength to diameter.mat';

14     goal=0;

15     disp('diameter:')

16     for i=1:81

17         if(pjwave(1)<ljwave(i,1))

18             if(i==1)

19                 disp('less than 30 nm')
```

```
1         goal=1;

2     else

3         if((pjwave(1)-ljwave(i-1,1))>(ljwave(i,1)-pjwave(1)))

4             disp(ljwave(i,2));

5         else

6             disp(ljwave(i-1,2))

7         end

8         goal=1;

9     end

10    break;

11 end

12 end

13

14 if(goal==0)

15     disp('more than108');

16 end
```
